# Supplementary material for: Harmonization of Multisite Dopamine Transporter Single-photon Emission Computed Tomography Data for Segregation of Patients with Parkinson's Disease from Healthy Older Adults
Source: Research Square preprint supplement (doi:10.21203/rs.3.rs-2766783/v1), 2023-05-16
Supplement: Supplementary file 1 [file d9f5bb57be9986ef3a50560c.docx]

**Supplementary Table 1. MDS-UPDRS scores in patients with PD in each center**

| **MDS-UPDRS** | **Center** | | | | **One-way ANOVA*** |
| --- | --- | --- | --- | --- | --- |
| **NCNP**  **(n= 16)** | **KPUM**  **(n= 5)** | **KU**  **(n= 48)** | **FMU**  **(n= 12)** |
| **Part Ⅰ** | 9.19 (4.74) | 8.83 (4.09) | 13.00 (4.49) | 8.83 (4.76) | F [3, 29.60]=5.37 (p=0.002) |
| **Part Ⅱ** | 10.31 (5.90) | 2.00 (1.58) | 17.02 (7.56) | 9.92 (6.11) | F [3, 46.43]=11.10 (p<0.001) |
| **Part Ⅲ** | 14.95 (10.00) | 10.46 (2.88) | 43.04 (13.40) | 23.33 (8.73) | F [3, 56.44]=28.72 (p<0.001) |
| **Part Ⅳ** | 0.81 (2.23) | 0.00 (0.00) | 6.38 (6.33) | 2.17 (2.21) | F [3, 73.16]=7.00 (p<0.001) |

Data are presented as mean (standard deviation).

* The results of one-way ANOVA are Brown-Forsythe corrected.

Abbreviations: MDS-UPDRS, Movement Disorder Society-sponsored revision of the Unified Parkinson’s Disease Rating Scale; PD, Parkinson’s disease; NCNP, National Center of Neurology and Psychiatry; KPUM, Kyoto Prefectural University of Medicine; KU, Kyoto University; FMU, Fukushima Medical University; ANOVA, analysis of variance

**Supplementary Table 2. SBR in each center**

| **Center** | **Group** | **Uncorrected data** | | | | **Phantom-operation corrected data** | | | | **ComBat-corrected data** | | | | |
| --- | --- | --- | --- | --- | --- | --- | --- | --- | --- | --- | --- | --- | --- | --- |
| **SBR** | **skewness** | **kurtosis** | **Shapiro-Wilk (p)*** | **SBR** | **skewness** | **kurtosis** | **Shapiro-Wilk (p)*** | **SBR** | **skewness** | **kurtosis** | **Shapiro-Wilk (p)*** |
| **NCNP** | HCs (n= 45) | 6.23  (1.12) | 0.00  (0.35) | -0.15  (0.70) | 0.47 | 6.54  (1.11) | 0.35  (0.35) | -0.40  (0.70) | 0.19 | 5.27  (0.87) | 0.30  (0.35) | -0.34  (0.70) | 0.63 |
| PDs (n= 16) | 3.22  (1.10) | -0.35  (0.56) | -1.06  (1.90) | 0.32 | 3.08  (0.97) | -0.42  (0.56) | -1.27  (1.09) | 0.16 | 2.09  (0.85) | -0.59  (0.56) | -0.85  (1.09) | 0.12 |
| **KPUM** | HCs (n= 6) | 4.55  (0.83) | -0.86  (0.85) | 1.06  (1.74) | 0.63 | 6.32  (0.74) | -0.34  (0.85) | -1.60  (1.74) | 0.43 | 5.02  (0.82) | 1.03  (0.85) | 1.73  (1.74) | 0.48 |
| PDs (n= 5) | 1.41  (0.66) | 0.60  (0.91) | -1.59  (2.00) | 0.59 | 3.08  (1.07) | -0.87  (0.91) | 0.43  (2.00) | 0.74 | 2.14  (0.97) | -0.65  (0.91) | 0.44  (2.00) | 0.84 |
| **KU** | HCs (n= 21) | 3.58  (0.77) | -0.01  (0.50) | -0.03  (0.97) | 0.26 | 6.76  (0.88) | 0.08  (0.50) | 0.73  (0.97) | 0.55 | 5.26  (0.97) | -0.23  (0.50) | 0.48  (0.97) | 0.49 |
| PDs (n= 48) | 0.19  (0.77) | 0.77  (0.34) | 0.69  (0.67) | 0.05 | 2.07  (0.80) | 0.22  (0.34) | -0.22  (0.67) | 0.70 | 1.98  (0.69) | 1.07  (0.34) | 2.95  (0.67) | 0.01 |
| **FMU** | PDs (n= 12) | 1.40  (0.85) | -0.39  (0.64) | -0.83  (1.23) | 0.65 | 2.17  (0.74) | -1.44  (0.64) | 2.13  (1.23) | 0.05 | 1.98  (0.72) | -0.66  (-0.64) | -0.32  (1.23) | 0.52 |
| **Total** | HCs (n= 72) | 5.32  (1.57) | 0.00  (0.28) | -0.76  (0.56) | 0.16 | 6.52  (1.06) | 0.22  (0.28) | -0.25  (0.56) | 0.35 | 5.25  (0.89) | 0.15  (0.28) | -0.14  (0.56) | 0.55 |
| PDs (n= 81) | 1.04  (1.45) | 0.85  (0.27) | 0.01  (0.53) | < 0.001 | 2.40  (0.99) | 0.30  (0.27) | -0.37  (0.53) | 0.50 | 2.01  (0.73) | 0.28  (0.27) | 0.73  (0.53) | 0.46 |

SBRs are presented as mean (standard deviation).

* The Shapiro–Wilk test provides the p-value for testing the null hypothesis that the samples of each facility came from a normally distributed population.

Abbreviations: SBR, skewness, and kurtosis; NCNP, National Center of Neurology and Psychiatry; KPUM, Kyoto Prefectural University of Medicine; KU, Kyoto University; FMU, Fukushima Medical University; HCs, healthy subjects; PDs, patients with Parkinson’s disease; SBR, specific binding ratio
